# Supplementary material for: A novel schisantherin B-loaded Prussian blue nanozyme for treating spinal cord injury
Source: Royal Society of Chemistry journal article supplement (doi:10.1039/d5tb02205c), 2025-12-17
Supplement: d5tb02205c1.pdf [file d5tb02205c1.pdf]

**Novel Schisantherin B-loaded Prussian blue nanozyme for treating Spinal Cord Injury**

Wei Wang<sup>1, 5, 6\*</sup>, Ensi Liu<sup>2\*</sup>, Jinxia Wang<sup>3</sup>, Jianfeng Li<sup>4</sup>, Sen Lin<sup>2#</sup>, Xifan Mei<sup>2,5,6#</sup>

<sup>1</sup> Graduate School of Dalian Medical University, Dalian 116044, Liaoning, China.

<sup>2</sup> Department of Orthopedics, The Third Affiliated Hospital of Jinzhou Medical University,  
Jinzhou 121000, China.

<sup>3</sup> Department of Hematology, Linyi Central Hospital, Linyi City 276400, Shandong Province,  
China.

<sup>4</sup> Innovation Platform of Regeneration and Repair of Spinal Cord and Nerve Injury, Department of  
Orthopaedic Surgery, The Seventh Affiliated Hospital, Sun Yat-sen University, Shenzhen,  
Guangdong, China, 518107.

<sup>5</sup>Liaoning Provincial Key Laboratory of Medical Tissue Engineering

<sup>6</sup> Liaoning Provincial Collaborative Innovation Center of Medical Testing and Drug Development

# Corresponding author.

Email: aldrin\_lin@163.com

Email: meixifan@jzmu.edu.cn

\*These authors contributed equally to this work

**This PDF file includes:**Supplementary Figure 1 To Figure 12.

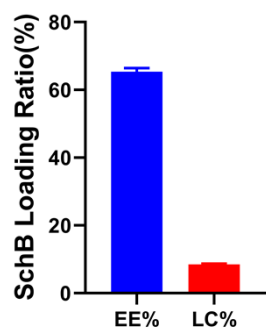

Supplementary Figure 1. EE% and LC% of SchB@PBzyme.

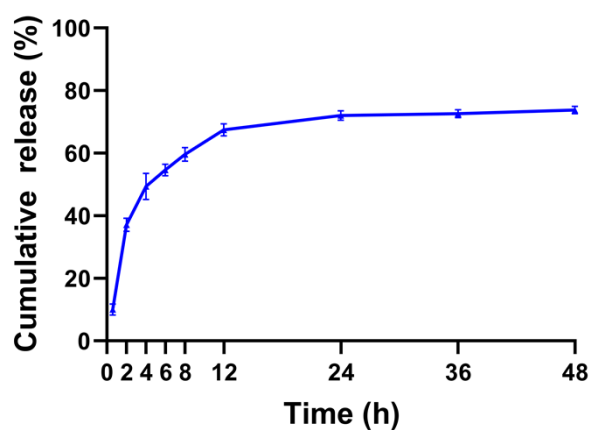

Supplementary Figure 2. Drug release of SchB@PBzyme.

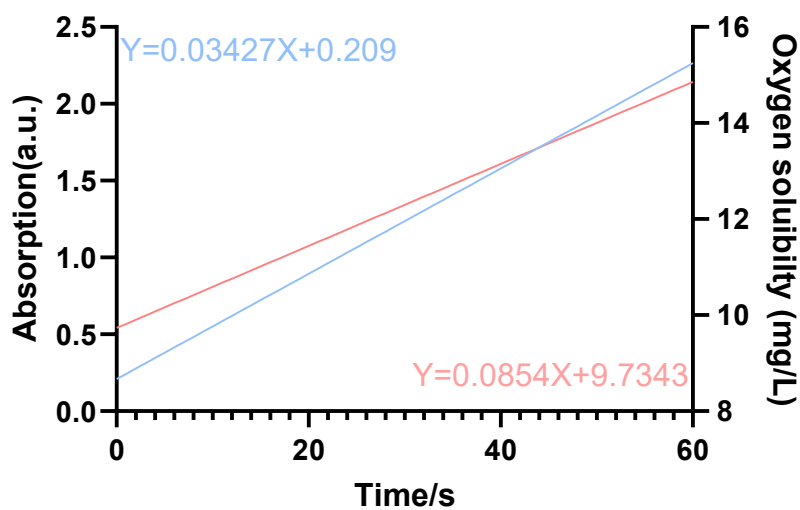

Supplementary Figure 3. SOD-like catalytic activity of SchB@PBzyme (left vertical axis).

CAT-like catalytic activity of SchB@PBzyme (right vertical axis).

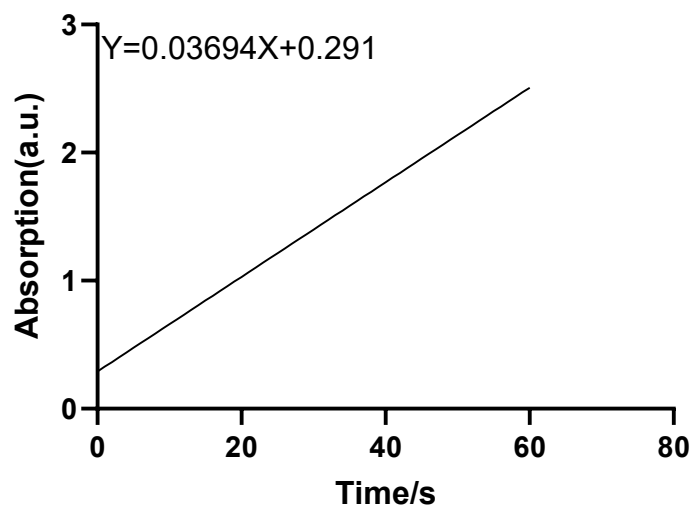

Supplementary Figure 4. SOD-like catalytic activity of PBzyme.

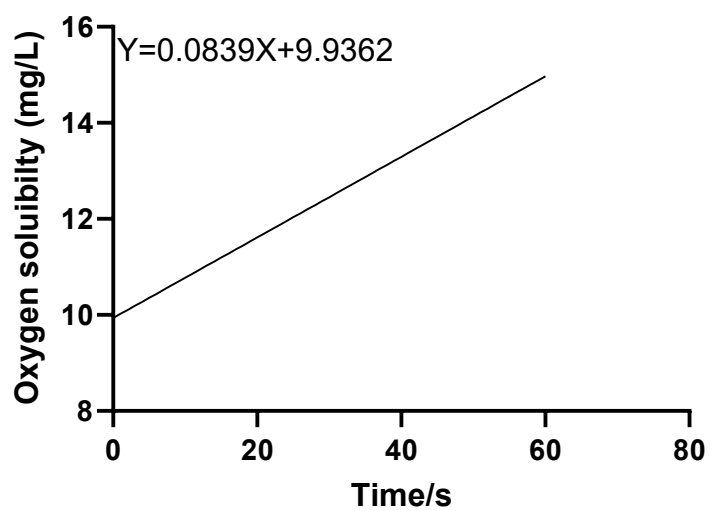

Supplementary Figure 5. CAT-like catalytic activity of PBzyme.

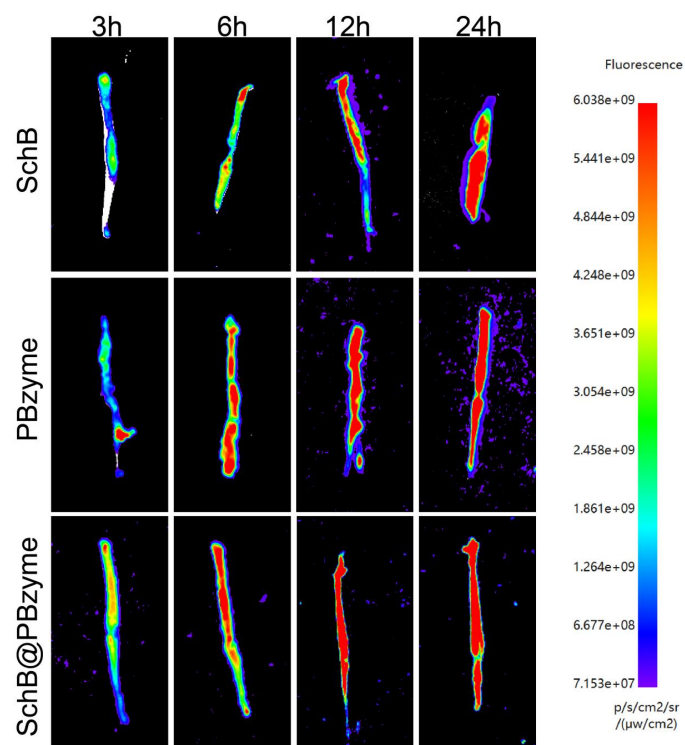

**Supplementary Figure 6.** Ex vivo fluorescent imaging of spinal cords from different groups of mice(n=3).

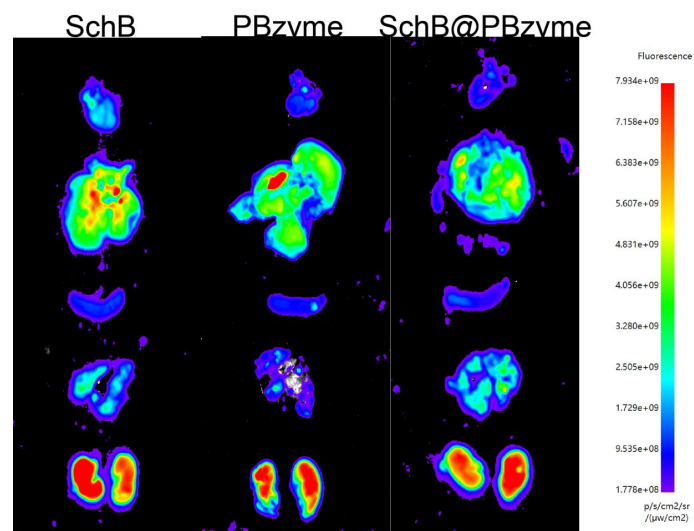

**Supplementary Figure 7.** Ex vivo fluorescence imaging of mouse organs from each material group (n=3).

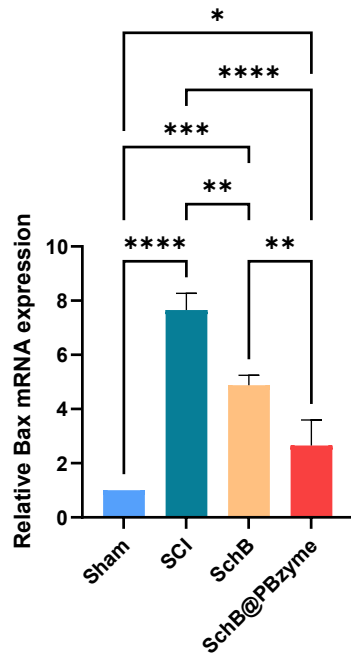

**Supplementary Figure 8.** Quantitative analysis of Bax relative mRNA expression.per group,  $*P < 0.05$ ,  $**P < 0.01$ , and ns: no significance, compared with the Sham group.

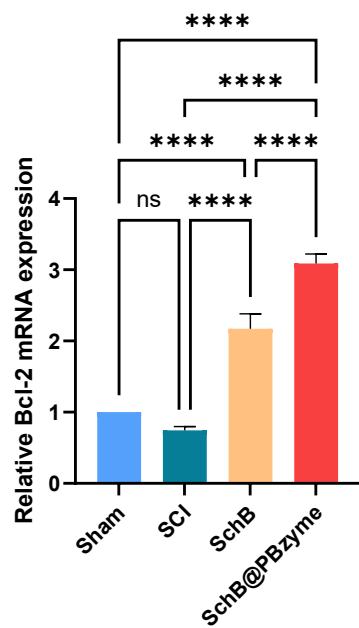

**Supplementary Figure 9.** Quantitative analysis of Bcl-2 relative mRNA expression.per group,  $*P < 0.05$ ,  $**P < 0.01$ , and ns: no significance, compared with the Sham group.

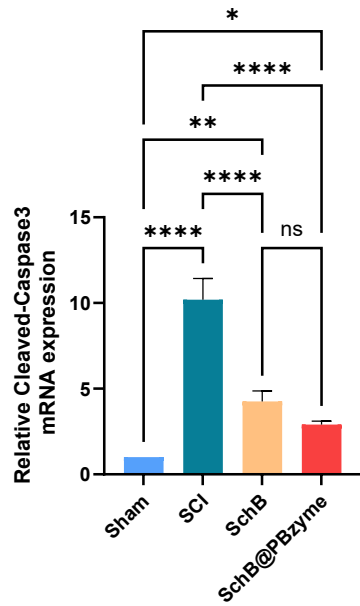

**Supplementary Figure 10.** Quantitative analysis of Cleaved Caspase-3 relative mRNA expression.per group, \* $P < 0.05$ , \*\* $P < 0.01$ , and ns: no significance, compared with the Sham group.

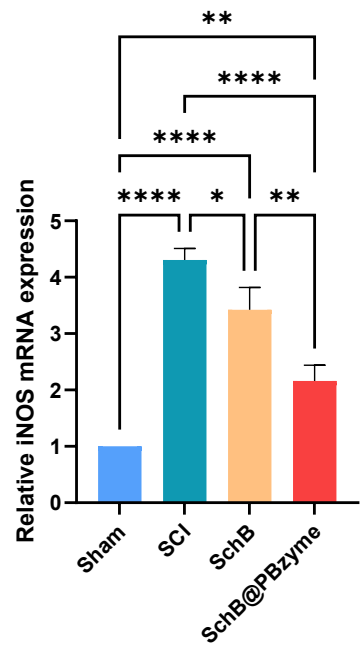

**Supplementary Figure 11.** Quantitative analysis of iNOS relative mRNA expression.per group, \* $P < 0.05$ , \*\* $P < 0.01$ , and ns: no significance, compared with the Sham group.

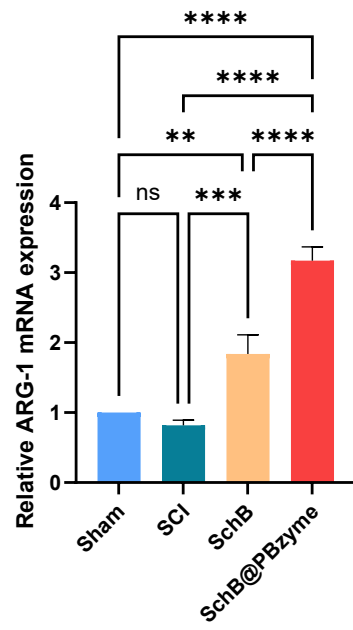

**Supplementary Figure 12.** Quantitative analysis of ARG-1 relative mRNA expression per group,

\* $P < 0.05$ , \*\* $P < 0.01$ , and ns: no significance, compared with the Sham group.
